1 Title: Predicted loss of function alleles in Bassoon (BSN) are associated with obesity  
2 Authors: Na Zhu\* 1,2, Charles A. LeDuc\* 1,3,4, Ilene Fennoy 1,4, Blandine Laferrère  
3 3,4,5, Claudia A. Doege 3,6, Yufeng Shen 2,7,8, Wendy K. Chung\*\* 1,3,4,5,9  
4 Rudolph L. Leibel\*\* 1,3,4

- 5 1. Department of Pediatrics, Columbia University Irving Medical Center, New  
6 York, NY, USA
- 7 2. Department of Systems Biology, Columbia University Irving Medical Center,  
8 New York, NY, USA
- 9 3. NY Obesity Research Center, Columbia University Irving Medical Center,  
10 New York, NY, USA
- 11 4. Naomi Berrie Diabetes Center, Columbia University Irving Medical Center,  
12 New York, NY, USA
- 13 5. Department of Medicine, Columbia University Irving Medical Center, New  
14 York, NY, USA
- 15 6. Department of Pathology, Columbia University Irving Medical Center, New  
16 York, NY 10032, USA
- 17 7. Department of Biomedical Informatics, Columbia University Irving Medical  
18 Center, New York, NY, USA
- 19 8. JP Sulzberger Columbia Genome Center, Columbia University Irving  
20 Medical Center, New York, NY, USA
- 21 9. Herbert Irving Comprehensive Cancer Center, Columbia University Irving  
22 Medical Center, New York, NY, USA

23  
24 \*Co-first authors

25 \*\* Co-senior/corresponding authors

NOTE: This preprint reports new research that has not been certified by peer review and should not be used to guide clinical practice.

26 **Abstract**

27 Bassoon (*BSN*) is a component of a hetero-dimeric presynaptic cytomatrix protein  
28 that orchestrates neurotransmitter release with Piccolo (*PCLO*) from glutamatergic  
29 neurons throughout the brain. Heterozygous missense variants in *BSN* have  
30 previously been associated with neurodegenerative disorders in humans. We  
31 performed an exome-wide association analysis of ultra-rare variants in about  
32 140,000 unrelated individuals from the UK Biobank to search for new genes  
33 associated with obesity. We found that rare heterozygous predicted loss of function  
34 (pLoF) variants in *BSN* are associated with higher BMI with log<sub>10</sub>-p value of 11.78 in  
35 the UK biobank cohort. The association was replicated in the All of Us whole  
36 genome sequencing data. Additionally, we have identified two individuals (one of  
37 whom has a *de novo* variant) with a heterozygous pLoF variant in a cohort of early  
38 onset or extreme obesity at Columbia University. Like the individuals identified in the  
39 UKBB and All of us Cohorts, these individuals have no history of neurobehavioral or  
40 cognitive disability. Heterozygosity for pLoF *BSN* variants constitutes a new etiology  
41 for obesity.

42

43 **Introduction:**

44 By 2030 it is estimated that roughly 50% of adults in the United States will have  
45 obesity, with 25% having severe obesity (1). The prevalence of obesity in U.S.  
46 adults has increased from 30.5 to 41.9% from 1999-2000; the prevalence of severe  
47 obesity has increased from 4.7 to 9.2%. Approximately 18% of U.S. children  
48 currently have obesity (2). Variously estimated, the risk of obesity is 30-50%  
49 heritable (3-6). Changes in the underlying genetics cannot be responsible for such  
50 changes in the prevalence of obesity over such a short period of time; however, the

51 propensity to gain weight in an environment with ready access to food is largely  
52 genetic (7). Genome wide association studies have identified many common variants  
53 associated with body weight regulation (8-10). More recently, polygenic risk scores  
54 aggregating large numbers genetic variants, each with small contributions to energy  
55 homeostasis can be used to predict obesity deciles in some genetic ancestries (11).  
56 However, the genetic attributable risk for obesity remains modest at ~3% (12, 13).  
57 Exome sequencing of large numbers of individuals has accelerated the discovery of  
58 rare genetic contributors to quantitative phenotypes such as height (14, 15), celiac  
59 disease (16), and dyslipidemia (17, 18). In many instances the precise  
60 mechanistically functional relevance of these associated genetic variants remains  
61 unknown.

62

63 Recent advances in the treatment of obesity (19) and hyperlipidemia (20) have used  
64 human genetics to identify genes contributing to extreme phenotypes to understand  
65 biology and molecular mechanisms and develop novel interventions. The advent of  
66 large-scale exome/genome sequencing in the United Kingdom Biobank (UKBB) and  
67 All of US has extended the ability to assess rare variants at large scale in addition to  
68 prior methods of assessing common variants in GWAS. In the current study we  
69 combine the power of exome sequence-based analysis of an extreme obesity cohort  
70 recruited at Columbia University with data from the UKBB and All of Us. We report  
71 the association of predicted loss of function (pLoF) alleles in the gene *BSN* with body  
72 mass index (BMI).

73

74

75 **Methods and Materials**

76 **Methods**

77 Columbia Cohort

78 The Columbia University Extreme Obesity cohort was collected using protocols  
79 approved by the Institutional Review Boards at Columbia University Irving Medical  
80 Center (New York, NY) and The Rockefeller University (New York, NY). The cohort  
81 consists of 1598 individuals from 903 families. Obesity was defined as described  
82 below. Of the 903 families, 122 constitute affected child/parent trios. The remaining  
83 781 families have 1372 affected (890 females and 482 males) and 226 unaffected  
84 family members. Cohort details have been described previously (21, 22).

85 Approximately half of the probands were pediatric (either recruitment or obesity  
86 onset age younger than 19 years old with 674 participants having a BMI Z  
87 score  $\geq 2$ ; average age at enrollment 6.6  $\pm$  3.6 years) and half adults (obesity  
88 onset or recruitment age at least 19 years old with 698 adults with BMI  $\geq 30$  kg/m<sup>2</sup>;  
89 average age 51.5  $\pm$  12.0 years) (Table 1). Samples were exome sequenced using  
90 xGen and SeqCap VCRome Capture. Greater than 99% of samples had depth of  
91 coverage  $> 10$  in 80% of target regions.

92 Controls were the unrelated parents (without autism) from the Simons Powering  
93 Autism Research for Knowledge (SPARK) study and were exome sequenced using  
94 the XGEN-Capture (23).

95

96 UKBB Cohort

97 For this analysis, we included 200,643 UK biobank cases (24). The average age of  
98 this cohort is 56.4  $\pm$  8.1 years; mean BMI of 27.3  $\pm$  4.8 kg/m<sup>2</sup>; 55.1% female  
99 (Table 2).

100

101 All of Us data

102 The current release (June 2022) of the All of Us data includes whole genome  
103 sequencing for 98,622 individuals (58,190 females and 38,290 males). The average  
104 age of this cohort is 52.6 +/- 16.9 years; mean BMI is 30.9 +/- 9.0 kg/m<sup>2</sup>.

105

106 *Bioinformatic analysis of exome or genome sequencing data*

107 Columbia cohort

108 Paired-end reads were mapped and aligned to the human reference genome  
109 (version GRCh38/hg38, accession GCA 000001405.15) using BWA-MEM (25).  
110 Picard v1.93 MarkDuplicates (<http://broadinstitute.github.io/picard/>) was used to  
111 identify and flag PCR duplicates and GATK v4.1 HaplotypeCaller (26) in Reference  
112 Confidence Model mode to generate individual-level gVCF files from the aligned  
113 sequence data. We performed joint calling of variants from the obesity cohorts using  
114 GATK variant caller.

115

116 Ancestry prediction and relatedness check

117 We predicted the ancestry and relatedness in the Columbia cohort using Peddy (27).  
118 Relatedness prediction in the UKBB samples, due to the large sample size, was  
119 completed with plink King (28). When pairs of samples shared second degree  
120 relationship or closer (a kinship coefficient greater than 0.12 in King or 0.25 in  
121 Peddy), the sample with greater relatedness to the cohort was excluded.

122

123 Variant annotation

124 We used the Ensembl Variant Effect Predictor (VEP, Ensemble 93) (29) to annotate  
125 variant function and ANNOVAR (30) to aggregate variant population frequencies and

126 for *in silico* predictions of deleteriousness. Rare variants were defined by a  
127 population frequency  $< 10^{-4}$  in gnomAD WES and WGS (31). Deleterious variants  
128 were defined as predicted loss of function (pLoF: including premature stop-gain,  
129 frameshift indels, canonical splicing variants and multi-exon deletions) or predicted  
130 damaging missense (Dmis) based on REVEL (32) score thresholds. The same  
131 pipeline was used for Columbia, UKBB, and All of US variant annotation.

132

### 133 *Statistical analysis*

#### 134 **Columbia cohort**

135 We tested the single variant association with obesity using the exact binomial test in  
136 the unrelated European participants. To identify novel risk genes for obesity in the  
137 Columbia cohort, we performed a rare variant gene burden test using the binomial  
138 test in unrelated European participants. When there were multiple individuals with  
139 obesity in a family, we defined the most severely affected as the proband (defined as  
140 the child with the highest Z-score or the adult with the highest BMI if there were only  
141 adults in the family).

142

143 A gene-based case-control association test was performed on 483 unrelated cases  
144 and 11,101 unrelated SPARK non-autism parents as population controls by  
145 comparing the frequency of rare deleterious variants in obese cases with SPARK  
146 controls. To minimize false positive variant calls and reduce batch effect, we applied  
147 additional heuristic filters in cases and controls by the following exclusion criteria (a  
148 variant was excluded if any one condition was met):  
149 Variants were filtered out if any of these exclusion criteria were met: (a) cohort allele  
150 frequency was  $> 0.01$ ; (b) the variant was not uniquely mappable; (c) genotype allelic

151 fraction was  $< 0.2$ ; (d) the variant was shared in multiple cases (alternate allele  
152 count  $> 4$ ) with at least half of the cases with low quality calls (allelic fraction  $< 0.35$ );  
153 (e) less than 90% of individuals (cases and controls) have  $\geq 10x$  depth of average of  
154 the variant site. (f) All variants in SPARK parents were required to pass the deep  
155 variant test (33, 34). (g) All single nucleotide variants (SNVs) were high quality calls  
156 defined by GATK VQSLOD  $> -3$  in the case cohort.

157

158 To assess the overall degree of batch effects, we compared the rare synonymous  
159 variant frequencies between cases and controls, testing the assumption that most  
160 rare synonymous variants do not have effects on obesity. A gene level burden test  
161 QQ plot for synonymous variants shows deflation with  $\lambda=0.75$  due to the  
162 limited case sample size resulting in genes that had no variants in the cases.  
163 Nevertheless, observed p-values were consistent with the expected p-value in the  
164 testable genes (Sup Figure 1).

165

166 To identify obesity-risk genes, we tested the deleterious variant burden (pLoF or  
167 Dmis) in each protein-coding gene in cases compared to controls using an exact  
168 binomial test. REVEL scores were used to predict the deleteriousness of missense  
169 variants. We performed 20 association tests for each gene, including pLoF only,  
170 Dmis only and Dmis + pLoF where Dmis was defined using 5 different REVEL score  
171 cutoffs (0.15 to 0.95 by 0.2).

172

### 173 **UKBB cohort**

174 After excluding related individuals and individuals with a history of cancer or eating  
175 disorder, 144,496 unrelated European individuals were selected for quantitative trait

176 (BMI) association analysis (31, 35). We collapsed rare variants based on allele  
177 frequency and predicted variant deleteriousness. The variants were partitioned into  
178 cohort frequency  $<10^{-4}$  and singleton population allele frequency groups as well as  
179 10 variant functional groups. The variant functional groups were missense variants  
180 with REVEL  $\geq x$ , with  $x$  ranging from 0.15 to 0.95 in 0.2 increments with or without  
181 pLoF variants (10 groups). Genes with less than 15 heterozygotes in a test group  
182 were removed. The significance threshold was set at  $(0.05 / (20 * 20,000))$ . We then  
183 tested the quantitative BMI for the 144K UKBB individuals using REGENIE (36),  
184 which accounts for relatedness, population structure and polygenicity. We included  
185 age, Townsend deprivation index at recruitment, smoking /alcohol status, sex, the  
186 first 8 principal components, and genetic heterozygosity as covariates. REGENIE  
187 resolved the gene-based association tests in the large UKBB dataset with no  
188 inflation or deflation in the synonymous variants with the gene-based tests (Sup  
189 Figure 2a). The type I error rate was well controlled for pLoF and Dmis variants in  
190 gene-based tests, showing minor inflation in the QQ plot (Sup Figure 2b).

191  
192 Finally, we ran a meta-analysis using Fisher's method ([https://cran.r-](https://cran.r-project.org/web/packages/metap/index.html)  
193 [project.org/web/packages/metap/index.html](https://cran.r-project.org/web/packages/metap/index.html)) for UKBB and Columbia samples with  
194 the same defined variant groups. We defined the threshold for genome-wide  
195 significance by Bonferroni correction for multiple testing ( $n=20,000*20$ , threshold  $p$ -  
196  $value=1.3e-7$ ) (workflow shown in Figure 1).

197

## 198 **All of Us**

199 To attempt to replicate findings from the UKBB analysis, we ran a linear regression  
200 on the 48,722 European ancestry individuals from the All of Us dataset using their



201 provided cloud-based research platform to test the association between BMI and  
202 *BSN* and *MEOX1* deleterious variants using age, sex, deprivation index and median  
203 income as covariates.

204

## 205 **Results**

206

207 In the single variant association tests, we identified two exome-wide significant single  
208 nucleotide variants (SNVs) in the Columbia cohort. rs887287256 is a c.C477A: p.  
209 Asp159Glu variant in *C6ORF52* (NM\_001388310.1). The Columbia cohort had six  
210 unrelated European individuals with obesity who were heterozygous, and no  
211 heterozygotes or homozygotes in 11,101 SPARK controls ( $-\log_{10}p$ , 8.27, RR=276).  
212 rs202058123, a c.G649A: p.Gly217Ser SNV in *CTRC* was present in five  
213 heterozygotes with obesity in the Columbia cohort and one of the SPARK controls ( $-\log_{10}p$   
214 6.1, RR =114) (Supplementary Table 1-3). We performed segregation  
215 analysis for those Columbia families with available family members (Supplementary  
216 Figure 3 and 4). All heterozygotes had obesity, but not all individuals with obesity in  
217 the family had the relevant variant. However, neither variant association was  
218 replicated when tested using the UKBB data.

219

220 We performed gene-based burden tests with 20 groups tested for each gene. Twelve  
221 tests in three unique genes (*MC4R*, *BSN*, and *MEOX1*) passed Bonferroni corrected  
222 significance ( $-\log_{10} p\text{-value} \geq 6.9$ ) in the combined association tests. Using a false  
223 discovery rate  $< 0.1$ , the most significant gene-variant sets are listed in Table 3,  
224 Supplemental Table 4 and 5.

225

226 Limiting the analysis to pLoF and Dmis variants with REVEL score  $\geq 0.25$ , the  
227 association test was genome-wide significant for MC4R, with a BMI effect size beta  
228 in UKBB of 1.4 kg/m<sup>2</sup> and relative risk for obesity of 5.03 in the Columbia cohort. The  
229 UKBB and Columbia heterozygotes are listed in Supplemental Table 6 and 7 and  
230 Supplemental Figure 5. Effect size was estimated with a linear regression test run on  
231 individual variants.

232

233 The combined (Columbia and UKBB) p-value ( $-\log_{10}P:10.33$ ) for BSN reached  
234 genome-wide significance. This signal is primarily driven by the UKBB data since  
235 pLoF and Dmis variants with REVEL score  $\geq 0.75$  are extremely rare (AF in UKBB  
236 was 9.3e-05) and few in number in the smaller Columbia cohort. The UKBB data  
237 alone have a strong signal with a BMI effect size beta of 6.21 and  $-\log_{10}p$  of 11.78.  
238 No positive effect size is observed in other missense groups. All heterozygous  
239 predicted deleterious variants in UKBB are listed in Supplemental Table 8. Figure 2a  
240 shows the BMI distribution of BSN predicted deleterious heterozygotes compared to  
241 the overall UKBB population (Kolmogorov-Smirnov pvalue 1.4e-05).

242

243 Two heterozygous pLoF *BSN* alleles were identified in the Columbia cohort (Figure  
244 2b). Study IDs are known only to the study staff. RU2487 is heterozygous for a *de*  
245 *novo* p.Gln703X allele in *BSN*. At the time of the last assessment, she was a Latina  
246 woman in her 20's with a history of severe obesity and type 2 diabetes mellitus  
247 diagnosed as a teen at which time her HbA1c was 7.4%. She was amenorrheic and  
248 had extensive acanthosis nigricans, dyslipidemia, hypothyroidism, and  
249 hyperandrogenism. Her maximal weight was 113 kg. She had gastric bypass surgery  
250 for weight loss in her 20's. Immediately prior to bariatric surgery, her BMI was 39.7

251 kg/m<sup>2</sup>. Her oral glucose tolerance test prior to bariatric surgery showed euglycemic  
252 hyperinsulinemia. Her nadir body weight after surgery was 77 kg; 2 years post-  
253 operatively she weighed 101 kg. She reports frequently feeling very hungry. She is a  
254 college graduate with no academic or cognitive difficulties nor history of psychiatric  
255 diagnoses. She has no family history of obesity or type 2 diabetes.

256

257 RU2617 is an African American female heterozygous for a p.R3494X variant in *BSN*;  
258 the allele was not inherited from the only parent available for genetic analysis. At the  
259 time of her initial evaluation, the patient was a teen with body weight of 162 kg and  
260 height of 160.9 cm (BMI=62.6 kg/m<sup>2</sup>). Her waist circumference was 158 cm. She had  
261 no history of irregular periods. She had obstructive sleep apnea requiring continuous  
262 positive airway pressure. She initially had a normal glucose tolerance test with  
263 normal fasting glucose and HbA1c = 6.3%; however, she subsequently developed  
264 impaired fasting blood glucose of 105 mg/dl with persistently elevated HbA1c. She  
265 had laparoscopic adjustable gastric banding as a teen. At 3 years post operatively,  
266 her weight had declined to 134.2 kg and her height had increased to 163 cm (BMI of  
267 50.5 kg/m<sup>2</sup>). HbA1c normalized to 5.2%.

268

269 The association of *MEOX1* with BMI was genome-wide significant (-log<sub>10</sub>P: 7.04) in  
270 the combined analysis of the UKBB and Columbia cohorts. In the Columbia cohort,  
271 deleterious missense variants (REVEL  $\geq 0.15$ ) were 10.2 times more frequent than  
272 in the SPARK participants. The singleton deleterious variants in *MEOX1* were  
273 marginally significantly associated with BMI in UKBB (-log<sub>10</sub>P 3.21, beta 0.84). The  
274 majority of singleton predicted deleterious *MEOX1* variants in the UKBB were  
275 associated with a higher BMI. The BMI in individuals with heterozygous *MEOX1*

276 deleterious missense variants was significantly higher than the overall UKBB (p  
277 value 0.03 using the Kolmogorov-Smirnov test). (Figure 3a and Supplemental Table  
278 9). In the Columbia cohort, *MEOX1* predicted Dmis variants (Table 4) were enriched  
279 in the pediatric-onset compared with the adult-onset obesity cases. There were 7  
280 heterozygotes out of 262 unrelated European ancestry obese children and 2  
281 heterozygotes out of 362 unrelated European ancestry obese adults ( $p=1.2e-6$  with a  
282 relative risk of 16.5 for the pediatric-onset group and  $p=0.13$  with a relative risk of  
283 3.4 in adult-onset group). For the *MEOX1* individual variants (Table 4 and Figure 3b),  
284 missense variant p.R213H (CADD score 27.5 and REVEL 0.926, indicating likely  
285 deleterious) was observed in 3 pediatric-onset and 1 severe adult-onset individuals  
286 in the Columbia cohort; there were none in SPARK participants. In the UKBB there  
287 were two heterozygote participants with p.R213H variants with BMI 26.4 and 29.9  
288 kg/m<sup>2</sup>. Across the combined TOPMED and gnomAD databases p.R213H was  
289 observed only once. The missense variant p.R184Q (CADD score 28.1, REVEL  
290 score 0.662) was observed in three pediatric-onset individuals in the Columbia  
291 cohort and twice in the SPARK participants. In the UKBB, there were 10  
292 heterozygotes: one had obesity, seven had overweight and two had normal BMI. The  
293 population frequency of the p.R184Q variant is  $8.5e-05$  in gnomAD and  $8e-05$  in  
294 TOPMED. Segregation analysis for the Columbia *MEOX1* heterozygotes showed  
295 that all the heterozygotes in those families had obesity (Figure 4).

296

## 297 Association of BMI-correlated traits in *BSN*

298 The association between *BSN* and the traits correlated with BMI tested using  
299 REGENIE (Table 5) showed arm, leg and trunk fat mass and leg fat-free mass and  
300 leg predicted mass reached genome-wide significance. We also tested the

301 association between *BSN* and ICD10 diagnoses (Supplemental Table 10) using the  
302 binomial test. No diagnosis was significantly associated with *BSN* after correction for  
303 multiple testing.

304

305 Replication analysis using All of Us data.

306 We identified *BSN* and *MEOX1* heterozygotes in the All of Us cohort. To date, there  
307 are 98,622 subjects for whom both whole genome sequencing and clinical data are  
308 available. Half of the participants (47,897) are unrelated and of European ancestry.

309 For each participant, we used the highest recorded BMI, giving a cohort average BMI  
310 of 30.1 +/- 7.8 kg/m<sup>2</sup>. In the cohort, 12 European individuals were heterozygous for  
311 *BSN* pLoF variants, with an average BMI of 37.0 +/- 5.7 kg/m<sup>2</sup>. Using sex, age,

312 income, and deprivation index as covariates, we tested the association between BMI

313 and *BSN* genotype using linear regression and found a significant association (p-

314 value=0.0075, beta=6.27). Additionally, we identified an additional six *BSN* pLoF

315 heterozygotes among the non-European participants (mean BMI 31.5 (SD = 8.5 kg/m<sup>2</sup>);

316 BMI range = 22-45; 3/6 with BMI >30.0; Supplemental Table 11). Thus, the *BSN* obesity

317 association observed in the UKBB and Columbia cohorts was replicated in the All of Us

318 cohort.

319 *MEOX1* predicted deleterious variants were not associated with higher BMI in All of Us

320 (pvalue=0.47, beta=0.57).

321

322

## 323 **Discussion**

324 We have identified a gene, *BSN*, for which we have demonstrated an association of

325 rare pLoF variants with obesity in two independent large cohorts: the UKBB and All

326 of Us. Additionally, we identified extremely obese individuals in the Columbia cohort

327 of extreme obesity, including an individual with extreme, early onset obesity  
328 associated with a *de novo* pLoF allele. There is no evidence that these variants are  
329 associated with intellectual disability or cognitive impairment, including direct  
330 assessment of two individuals in the Columbia cohort. A second gene, *MEOX*, was  
331 identified with predicted Dmis variants associated with obesity in the UKBB and  
332 Columbia cohorts, but this finding was not replicated in the All of Us cohort.

333

334 *BSN* (bassoon) is expressed primarily in the brain (including embryonic and adult  
335 brain regions that impact feeding behavior (37)), inner hair cell ribbons, and the  
336 retina of mammals. Bassoon is a presynaptic scaffold protein localized in the  
337 cytomatrix at the active zone (CAZ) where it functions to orchestrate  
338 neurotransmitter release. Bassoon participates in the formation of Golgi-derived  
339 Piccolo-Bassoon transport vesicles that are axonally transported to newly formed  
340 synaptic contacts. Bassoon is associated with activity-dependent short- and long-  
341 term neuronal plasticity (38).

342

343 Bassoon is expressed during early neuronal differentiation, is selectively sorted into  
344 axons and is among the first proteins to arrive at nascent synapses (38). The release  
345 of neurotransmitters from the presynaptic terminal involves the active zone (AZ). The  
346 AZ includes an electron-dense protein meshwork, the presynaptic cytomatrix.  
347 Bassoon is one of several scaffolding proteins (along with Piccolo (*PCLO*), *RIM*,  
348 *MUNC13*, and *ELKS*) within the presynaptic cytomatrix. *BSN* and *PCLO* are  
349 structurally related, interact, and are the largest active-zone-specific proteins. Unlike  
350 other the proteins in the AZ that are evolutionally conserved down to *C. elegans*,  
351 Piccolo and Bassoon are only found in vertebrates (39).

352

353 Mice homozygous for LoF *Bsn* alleles have reduced synaptic transmission that is  
354 primarily caused by the inactivation of a significant fraction of glutamatergic  
355 synapses. These mice have spontaneous epileptic seizures. Bassoon is not  
356 essential for synapse formation but is essential for regulated neurotransmitter  
357 release from a subset of glutamatergic synapses. (40). At the ultrastructural level,  
358 these inactive synapses cannot be distinguished from functional synapses. These  
359 homozygous Bassoon mutant mice have seizures with structural brain alterations  
360 including enlarged hippocampi and cerebral cortices (41). These animals are not  
361 obese.

362

363 Bassoon is involved in the maintenance of the integrity of AZ (42). Glutamatergic  
364 synapses from *Bsn* knockout mice exhibit enhanced short-term synaptic depression  
365 with a high percentage of silent synapses but have no gross structural defects (43),  
366 presumably due to the significant functional redundancy with Picolo. When both  
367 proteins are absent from glutamatergic synapses, the cells undergo synapse  
368 degeneration (44).

369

370 *BSN* was originally identified while attempting to identify expressed cerebellar  
371 transcripts in patients with multiple system atrophy, a rare progressive  
372 neurodegenerative disease characterized by cerebellar symptoms, parkinsonism,  
373 and autonomic dysfunction (45). This study did not find coding mutations in *BSN* but  
374 first identified *BSN* as a new transcript that they could clone from the cerebellum of  
375 these patients. *BSN* acts in concert with Parkin RBR E3 Ubiquitin Protein Ligase  
376 (PRKN) to control presynaptic autophagy and maintain homeostatic presynaptic

377 proteostasis and synaptic vesicle turnover (46). Human heterozygous missense  
378 variants in *BSN* have been implicated in neurodevelopmental and neurodegenerative  
379 disorders including progressive supranuclear palsy-like syndrome, a rare  
380 neurodegenerative tauopathy (47).

381

382 We have implicated heterozygous pLoF variants in *BSN* as a new genetic etiology  
383 for human obesity that is not associated with adverse impact on cognition or other  
384 neurobehavioral phenotypes. The expression of *BSN* throughout the brain suggests  
385 that gene dosage could contribute to hyperphagia through both homeostatic and  
386 hedonic circuits (48). Additional detailed phenotypic assessment – ideally of  
387 individuals prior to the onset of obesity - will be required to assess this point. *BSN* is  
388 expressed in the synapses of glutamatergic neurons and hypothalamic neurons  
389 mechanistically tied to ingestive behaviors (43, 49-51). The valence of these effects  
390 is consistent with hyperphagic obesity conveyed by hypomorphic alleles.

391

392 Declarations:

393 Competing interests: No author has any conflicts or competing interests related to the  
394 manuscript.

395 IRB: All studies were under the auspices of the Columbia University IRB "Molecular  
396 Genetic Analysis of Obesity and Non-Insulin Dependent Diabetes Mellitus" IRB #:  
397 AAAA4485 which expires on 5/1/23.

398

399 Acknowledgements

400 We thank the participants who generously contributed to this work and their  
401 clinicians who referred them.



402 This work was supported by NIH grant NIDDK 52431 and the NY Nutrition and

403 Obesity Research Center: P30DK26685.

404

405

406 Tables

407 Table 1.

|                         | Child-onset       | Adult-onset       |
|-------------------------|-------------------|-------------------|
| <b>BMI (mean, sd)</b>   | <b>41.4, 12.4</b> | <b>45.9, 11.9</b> |
| <b>BMIZ (mean,sd)</b>   | <b>6.6, 3.6</b>   |                   |
| <b>age (mean,sd)</b>    | <b>12.2, 3.5</b>  | <b>38.9, 12.3</b> |
| <b>F:M</b>              | <b>523:377</b>    | <b>503:195</b>    |
| <b>EUR</b>              | <b>322</b>        | <b>528</b>        |
| <b>AFR</b>              | <b>159</b>        | <b>85</b>         |
| <b>AMR</b>              | <b>184</b>        | <b>81</b>         |
| <b>other ancestries</b> | <b>9</b>          | <b>4</b>          |
| <b>total</b>            | <b>674</b>        | <b>698</b>        |

408

409

410

411 Clinical characteristics of Columbia extreme or early-onset obesity cohort. BMI is

412 body mass index. BMIZ is BMI z score. F is female. M is male. EUR indicates

413 European ancestry, AFR is African-American ancestry, AMR is admixed Americans

414 ancestry.

415 Table 2. Summary of United Kingdom Biobank subjects.

| Table 2 UKBB cohort summary                         |              |
|-----------------------------------------------------|--------------|
| Overall Cohort                                      |              |
| BMI (mean, sd)                                      | 27.3, 4.8    |
| age (mean, sd)                                      | 56.5, 8.1    |
| F:M                                                 | 110476:90153 |
| EUR ancestry                                        | 167,246      |
| ---removed for relatedness                          | 4,878        |
| ---had cancer                                       | 16,711       |
| ---had eating disorder                              | 112          |
| ---cancer and eating disorder                       | 18           |
| Cohort Included in study                            |              |
| EUR no cancer, no eating disorder                   | 145,103      |
| F:M                                                 | 78103:67000  |
| BMI (mean, sd)                                      | 27.5, 4.7    |
| age (mean, sd)                                      | 56.6         |
| Correlation between age and BMI =0.048, significant |              |
| correlation between age and Sex =0.082, significant |              |

416

417 The UKBB cohort use in the analysis. Samples that were coded with, cancer, eating  
418 disorders, or both were removed from the cohort prior to analysis.

419 Relatedness was estimated using plink King, when sample pairs had a relatedness  
420 greater than 0.12 (second degree relative or closer) the sample that had more  
421 relatedness to the cohort was excluded.

422

423

424 Table 3 Meta analysis for UKBB REGENIE linear regression and Columbia binary  
425 burden test

| GeneName      | log10(combinedPvalue) | FDR      | variant_function.filter | MAF.filter | AF.UKBB  | BETA.UKBB | SE.UKBB | LOG10.pvalue.UKBB | AF.Columbia | AF.SPARK | RR.Columbia | LOG10.Pvalue.Columbia |
|---------------|-----------------------|----------|-------------------------|------------|----------|-----------|---------|-------------------|-------------|----------|-------------|-----------------------|
| <i>MC4R</i>   | 11.08                 | 1.50E-06 | LoF+Drevel >=0.35       | 0.0001     | 1.29E-03 | 1.53      | 0.24    | 9.50              | 7.25E-03    | 1.40E-03 | 5.19        | 3.05                  |
| <i>BSN</i>    | 10.33                 | 4.23E-06 | LoF+Drevel>=0.75        | 0.0001     | 9.34E-05 | 6.36      | 0.90    | 11.78             | 0           | 3.15E-04 | 0           | 0                     |
| <i>MEOX1</i>  | 7.04                  | 2.03E-03 | Drevel>=0.15            | singleton  | 1.07E-04 | 2.88      | 0.84    | 3.21              | 8.28E-03    | 8.11E-04 | 10.21       | 5.14                  |
| <i>PCSK1</i>  | 5.48                  | 0.04     | LoF+Drevel>=0.35        | 0.0001     | 1.88E-03 | 0.99      | 0.20    | 6.08              | 3.11E-03    | 1.71E-03 | 1.81        | 0.61                  |
| <i>HECTD4</i> | 5.13                  | 0.07     | LoF+Drevel>=0.75        | singleton  | 2.21E-04 | 2.76      | 0.58    | 5.61              | 1.04E-03    | 1.80E-04 | 5.75        | 0.72                  |
| <i>ACAP3</i>  | 5.06                  | 0.07     | LoF+Drevel>=0.95        | singleton  | 7.61E-05 | 4.99      | 1.00    | 6.25              | 0           | 0.00E+00 | NA          | 0                     |

426

427

428 The statistical results from the UKBB and CUIMC cohorts were combined using the  
429 Fisher method. Genes with a meta pvalue < 0.00001 and False discovery rate (FDR)  
430 < 0.1 are listed. FDR for meta p-value were calculated using Benjamin – Hochberg  
431 method. The smallest p-value for each gene are listed. The log10 significance  
432 threshold after Bonferroni correction was 6.9. *BSN* and *MEOX1* were novel genes  
433 reached the genome wide significance. *MC4R* and *PCSK1* are known obesity risk  
434 genes.

435

436

437 Table 4. Predicted deleterious variants in *MEOX1* in the Columbia cohort.  
438 Phenotype, variant, predicted variant severity, and ancestry of the *MEOX1*  
439 heterozygotes in Columbia cohort.

440  
441

| Family_ID | Relationship with proband | Affected   | Sex    | Ancestry | OnsetGroup          | Age at recorded BMI | BMI (kg/m <sup>2</sup> ) | BMI Z | HGVSc    | HGVSp       | CADD14_Raw | CADD14_PHRED | REVEL |
|-----------|---------------------------|------------|--------|----------|---------------------|---------------------|--------------------------|-------|----------|-------------|------------|--------------|-------|
| 223       | daughter                  | unaffected | female | EUR      |                     | 10-19               | 19.5                     |       | c.109C>G | p.His37Asp  | 3.17       | 23.3         | 0.53  |
| 635       | Proband                   | Obese      | female | EUR      | Child               | 10-19               | 38.5                     | 4.2   | c.109C>G | p.His37Asp  | 3.17       | 23.3         | 0.53  |
| 757       | Proband                   | Obese      | female | EUR      | Child (onset at 8y) | 60-69               | 68.6                     | NA    | c.326C>T | p.Pro109Leu | 1.94       | 19.22        | 0.17  |
| X14       | Proband                   | Obese      | male   | AFR      | Child               | 10-19               | 33.7                     | 5.6   | c.451C>T | p.Arg151Trp | 4.51       | 31           | 0.54  |
| 392       | Father                    | Obese      | male   | AFR      | Adult               | 30-39               | 30.8                     | NA    | c.505A>G | p.Ser169Gly | 2.49       | 22           | 0.28  |
| 392       | Proband                   | Obese      | female | AFR      | Child               | 0-9                 | 30.5                     | 8.2   | c.505A>G | p.Ser169Gly | 2.49       | 22           | 0.28  |
| 267       | Aunt                      | Obese      | female | EUR      | Adult               | 40-49               | 59.3                     | NA    | c.527C>T | p.Thr176Met | 4.31       | 28.6         | 0.91  |
| 24        | Proband                   | Obese      | female | EUR      | Child               | 10-19               | 38.0                     | 4.1   | c.551G>A | p.Arg184Gln | 4.26       | 28.1         | 0.66  |
| 662       | Sibling                   | Obese      | female | EUR      | Child               | 10-19               | 46.9                     | 6.3   | c.551G>A | p.Arg184Gln | 4.26       | 28.1         | 0.66  |
| 662       | Proband                   | Obese      | male   | EUR      | Child               | 10-19               | 45.0                     | 7.1   | c.551G>A | p.Arg184Gln | 4.26       | 28.1         | 0.66  |
| 217       | proband                   | Obese      | female | EUR      | Adult               | 40-49               | 55.3                     | NA    | c.614C>T | p.Ala205Val | 4.11       | 27.1         | 0.97  |
| 39_1      | Proband                   | Obese      | female | EUR      | Child               | 10-19               | 37.3                     | 3.9   | c.638G>A | p.Arg213His | 4.17       | 27.5         | 0.93  |
| 374       | Mother                    | Obese      | female | EUR      | Adult               | 20-29               | 47.3                     | NA    | c.638G>A | p.Arg213His | 4.17       | 27.5         | 0.93  |
| 374       | Proband                   | Obese      | male   | EUR      | Child               | 0-9                 | 44.8                     | 13.4  | c.638G>A | p.Arg213His | 4.17       | 27.5         | 0.93  |
| 159       | 3rd degree relative       | Obese      | female | EUR      | Child               | 10-19               | 47.9                     | 6.6   | c.638G>A | p.Arg213His | 4.17       | 27.5         | 0.93  |

442  
443

444 Figures

Figure 1. Summary of workflow

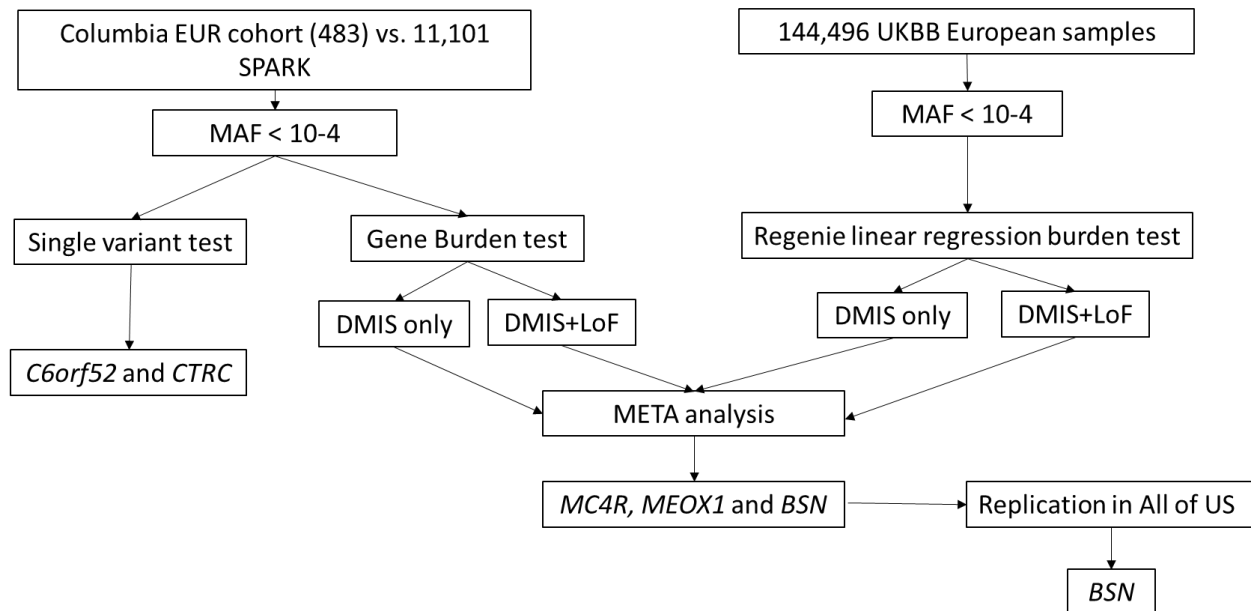

9 DMIS definitions: REVEL>=[0.15,0.25, 0.35,0.45,0.55,0.65,0.75,0.85,0.95], total of 19 test groups

445

446 Figure 1.

447 Workflow summary. Only rare ( $MAF < 10^{-4}$ ) variants are filtered. For the Columbia  
 448 European cohort, all rare variants are put through both a single variant test and a  
 449 gene burden test. For the UKBB variants, all rare variants are tested using the  
 450 regenie linear regression burden test. Genes with 19 different Dmis definitions are  
 451 compared in a Meta analysis that integrates both datasets. Replication in the three  
 452 genes that reached significance were attempted in the All of Us dataset, with *BSN*  
 453 replicating.

454

455

Figure 2  
a)

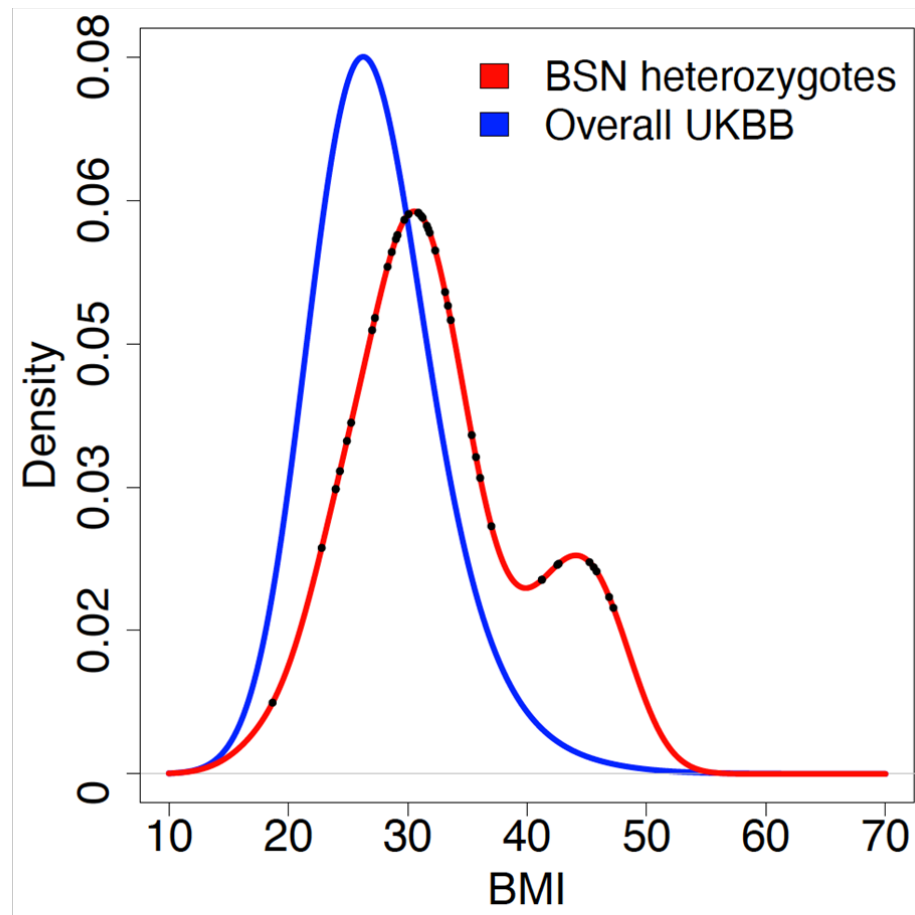

b)

| ID     | sex    | age   | Ancestry | BMI  | BMIZ | medical conditions                                  | HGVSc      | HGVSp        | Inheritance |
|--------|--------|-------|----------|------|------|-----------------------------------------------------|------------|--------------|-------------|
| RU2617 | female | 10-19 | AMR      |      | 10.3 | obesity, sleep apnea, depression                    | c.2107C>T  | p.Gln703Ter  | unknown     |
| RU2487 | female | 20-29 | AFR      | 31.7 |      | Isolated obese, prior bariatric surgery, T2DM @18yo | c.10480C>T | p.Arg3494Ter | de novo     |

456

457

Figure 2.

458 BMI density distribution. a) The BMI density distribution for pLoF *BSN* heterozygotes

459 is shifted to a higher BMI than the overall UKBB cohort. A.) There is a bi-modal

460 distribution for the *BSN* pLoF heterozygotes. The distribution difference between

461 overall cohort and UKBB heterozygotes was tested using the Kolmogorow-Smirnov

462 method ( $p=1.4e-05$ ). The dots in the blue curve represent the *BSN* predicted

463 deleterious variants samples' BMI.

464 b) Phenotype of *BSN* pLoF heterozygotes in the Columbia cohort.

465

466

Figure 3

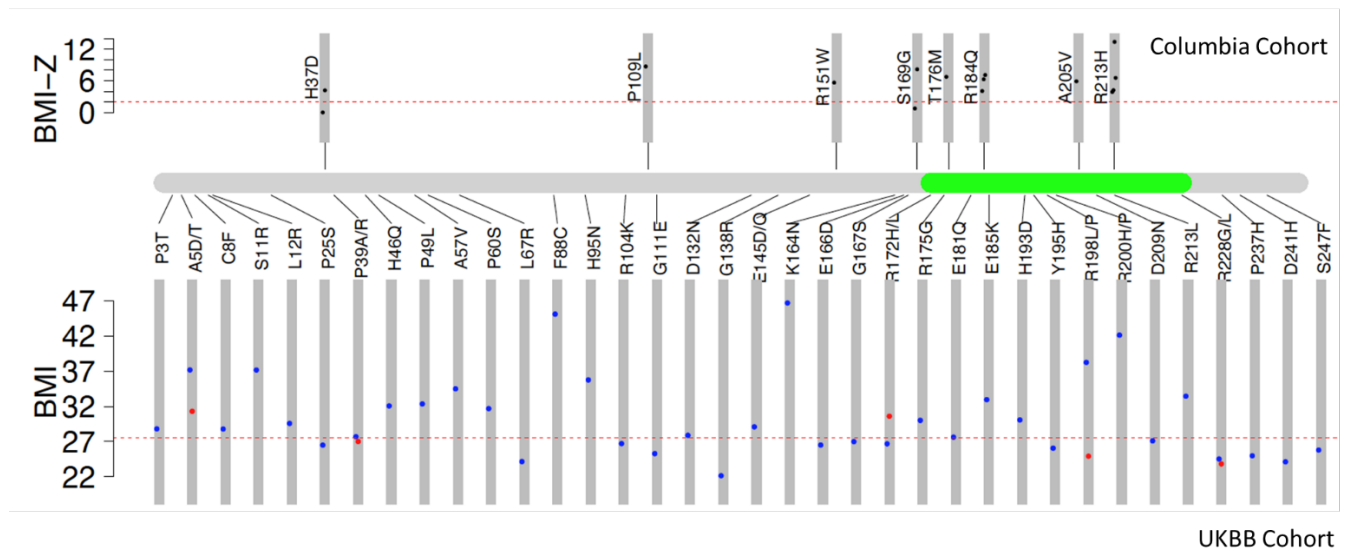

467

468 Figure 3.

469 Lollipop plot for *MEOX1*. The upper panel shows BMI-Z distribution for rare  
 470 deleterious variants (population frequency  $< 10^{-4}$  and  $\text{revel score} \geq 0.15$ ) in the  
 471 Columbia cohort. BMI-Z for adult samples was the normalized BMI score using  
 472 UKBB mean and standard deviation and BMI-Z for the child was the raw BMI-Z  
 473 score. The lower panel shows the singleton deleterious variants in the UKBB. The  
 474 BMI distribution difference between *MEOX1* singleton deleterious variants carriers  
 475 with the overall UKBB cohort is 0.03.

476

477



## Figure 4 *MEOX1* segregation

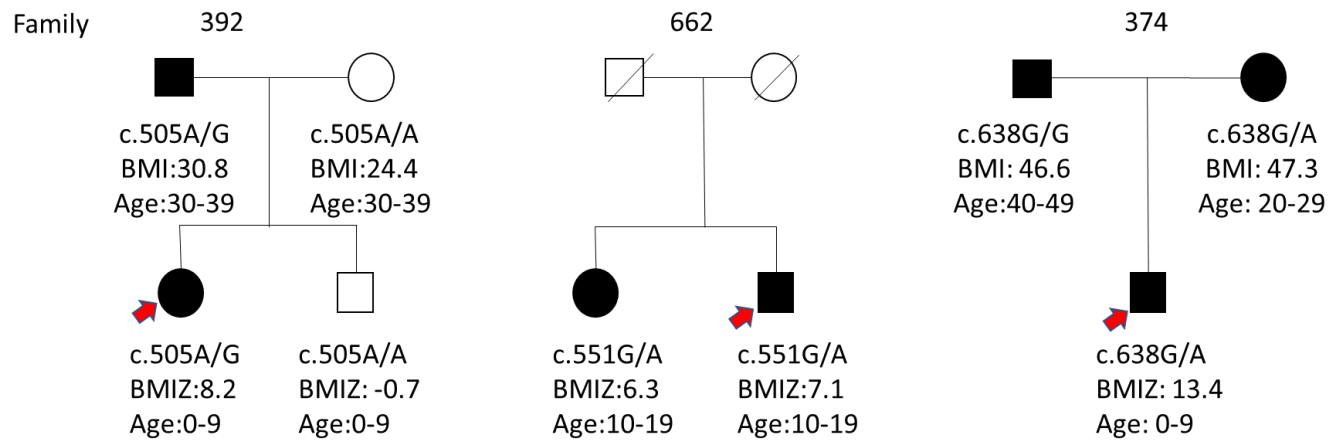

478

479 Figure 4.

480 Columbia *MEOX1* heterozygous pedigrees. Shaded symbol represents obese

481 person, red arrow indicates the proband in the family. BMI or BMIZ are indicated

482 under the symbols.

483

484

## 485 Bibliography

486

- 487 1. Ward ZJ, Bleich SN, Cradock AL, Barrett JL, Giles CM, Flax C, et al. Projected U.S.  
488 State-Level Prevalence of Adult Obesity and Severe Obesity. *N Engl J Med*.  
489 2019;381(25):2440-50.
- 490 2. National Health and Nutrition Examination Survey 2017–March 2020 Prepandemic  
491 Data Files Development of Files and Prevalence Estimates for Selected Health Outcomes,  
492 (2021).
- 493 3. Llewellyn CH, Trzaskowski M, Plomin R, Wardle J. Finding the missing heritability in  
494 pediatric obesity: the contribution of genome-wide complex trait analysis. *Int J Obesity*.  
495 2013;37(11):1506-9.
- 496 4. Loos RJF, Janssens ACJW. Predicting Polygenic Obesity Using Genetic Information.  
497 *Cell Metab*. 2017;25(3):535-43.
- 498 5. Luke A, Guo X, Adeyemo AA, Wilks R, Forrester T, Lowe W, et al. Heritability of  
499 obesity-related traits among Nigerians, Jamaicans and US black people. *Int J Obesity*.  
500 2001;25(7):1034-41.
- 501 6. Maes HHM, Neale MC, Eaves LJ. Genetic and environmental factors in relative body  
502 weight and human adiposity. *Behav Genet*. 1997;27(4):325-51.
- 503 7. Albuquerque D, Nobrega C, Manco L, Padez C. The contribution of genetics and  
504 environment to obesity. *Brit Med Bull*. 2017;123(1):159-73.
- 505 8. Wang K, Li WD, Zhang CK, Wang Z, Glessner JT, Grant SF, et al. A genome-wide  
506 association study on obesity and obesity-related traits. *PLoS One*. 2011;6(4):e18939.
- 507 9. Speakman JR, Loos RJF, O'Rahilly S, Hirschhorn JN, Allison DB. GWAS for BMI: a  
508 treasure trove of fundamental insights into the genetic basis of obesity. *Int J Obes (Lond)*.  
509 2018;42(8):1524-31.
- 510 10. Scuteri A, Sanna S, Chen WM, Uda M, Albai G, Strait J, et al. Genome-wide  
511 association scan shows genetic variants in the FTO gene are associated with obesity-related  
512 traits. *PLoS Genet*. 2007;3(7):e115.
- 513 11. Khera AV, Chaffin M, Wade KH, Zahid S, Brancale J, Xia R, et al. Polygenic Prediction  
514 of Weight and Obesity Trajectories from Birth to Adulthood. *Cell*. 2019;177(3):587-96 e9.
- 515 12. Loos RJF, Yeo GSH. The genetics of obesity: from discovery to biology. *Nat Rev*  
516 *Genet*. 2022;23(2):120-33.
- 517 13. Loos RJ. The genetics of adiposity. *Curr Opin Genet Dev*. 2018;50:86-95.
- 518 14. Marouli E, Graff M, Medina-Gomez C, Lo KS, Wood AR, Kjaer TR, et al. Rare and low-  
519 frequency coding variants alter human adult height. *Nature*. 2017;542(7640):186-90.
- 520 15. Lanktree MB, Guo YR, Murtaza M, Glessner JT, Bailey SD, Onland-Moret NC, et al.  
521 Meta-analysis of Dense Genecentric Association Studies Reveals Common and Uncommon  
522 Variants Associated with Height. *Am J Hum Genet*. 2011;88(1):6-18.
- 523 16. Trynka G, Hunt KA, Bockett NA, Romanos J, Mistry V, Szperl A, et al. Dense  
524 genotyping identifies and localizes multiple common and rare variant association signals in  
525 celiac disease. *Nat Genet*. 2011;43(12):1193-U45.
- 526 17. Stitzel NO, Peloso GM, Abifadel M, Cefalu AB, Fouchier S, Motazacker MM, et al.  
527 Exome Sequencing in Suspected Monogenic Dyslipidemias. *Circ-Cardiovasc Gene*.  
528 2015;8(2):343-+.

- 529 18. Goodrich JK, Singer-Berk M, Son R, Sveden A, Wood J, England E, et al. Determinants  
530 of penetrance and variable expressivity in monogenic metabolic conditions across 77,184  
531 exomes. *Nat Commun.* 2021;12(1).
- 532 19. Wilding JPH, Calanna S, Kushner RF. Once-Weekly Semaglutide in Adults with  
533 Overweight or Obesity. Reply. *N Engl J Med.* 2021;385(1):e4.
- 534 20. Musunuru K, Pirruccello JP, Do R, Peloso GM, Guiducci C, Sougnez C, et al. Exome  
535 sequencing, ANGPTL3 mutations, and familial combined hypolipidemia. *N Engl J Med.*  
536 2010;363(23):2220-7.
- 537 21. Gill R, Cheung YH, Shen YF, Lanzano P, Mirza NM, Ten S, et al. Whole-Exome  
538 Sequencing Identifies Novel LEPR Mutations in Individuals with Severe Early Onset Obesity.  
539 *Obesity.* 2014;22(2):576-84.
- 540 22. Li P, Tiwari HK, Lin WY, Allison DB, Chung WK, Leibel RL, et al. Genetic association  
541 analysis of 30 genes related to obesity in a European American population. *Int J Obes*  
542 (Lond). 2014;38(5):724-9.
- 543 23. Feliciano P, Daniels AM, Snyder LG, Beaumont A, Camba A, Esler A, et al. SPARK: A  
544 US Cohort of 50,000 Families to Accelerate Autism Research. *Neuron.* 2018;97(3):488-93.
- 545 24. Backman JD, Li AH, Marcketta A, Sun D, Mbatchou J, Kessler MD, et al. Exome  
546 sequencing and analysis of 454,787 UK Biobank participants. *Nature.* 2021;599(7886):628-  
547 34.
- 548 25. Li H, Ruan J, Durbin R. Mapping short DNA sequencing reads and calling variants  
549 using mapping quality scores. *Genome Res.* 2008;18(11):1851-8.
- 550 26. DePristo MA, Banks E, Poplin R, Garimella KV, Maguire JR, Hartl C, et al. A framework  
551 for variation discovery and genotyping using next-generation DNA sequencing data. *Nat*  
552 *Genet.* 2011;43(5):491-8.
- 553 27. Pedersen BS, Quinlan AR. Who's Who? Detecting and Resolving Sample Anomalies in  
554 Human DNA Sequencing Studies with Peddy. *Am J Hum Genet.* 2017;100(3):406-13.
- 555 28. Manichaikul A, Mychaleckyj JC, Rich SS, Daly K, Sale M, Chen WM. Robust  
556 relationship inference in genome-wide association studies. *Bioinformatics.*  
557 2010;26(22):2867-73.
- 558 29. McLaren W, Gil L, Hunt SE, Riat HS, Ritchie GRS, Thormann A, et al. The Ensembl  
559 Variant Effect Predictor. *Genome Biol.* 2016;17.
- 560 30. Wang K, Li MY, Hakonarson H. ANNOVAR: functional annotation of genetic variants  
561 from high-throughput sequencing data. *Nucleic Acids Res.* 2010;38(16).
- 562 31. Karczewski KJ, Francioli LC, Tiao G, Cummings BB, Alfoldi J, Wang Q, et al. The  
563 mutational constraint spectrum quantified from variation in 141,456 humans. *Nature.*  
564 2020;581(7809):434-43.
- 565 32. Ioannidis NM, Rothstein JH, Pejaver V, Middha S, McDonnell SK, Baheti S, et al.  
566 REVEL: An Ensemble Method for Predicting the Pathogenicity of Rare Missense Variants. *Am*  
567 *J Hum Genet.* 2016;99(4):877-85.
- 568 33. Poplin R, Chang PC, Alexander D, Schwartz S, Colthurst T, Ku A, et al. A universal SNP  
569 and small-indel variant caller using deep neural networks. *Nat Biotechnol.* 2018;36(10):983-  
570 +.
- 571 34. Yun T, Li H, Chang PC, Lin MF, Carroll A, McLean CY. Accurate, scalable cohort variant  
572 calls using DeepVariant and GLnexus. *Bioinformatics.* 2020;36(24):5582-9.
- 573 35. Bycroft C, Freeman C, Petkova D, Band G, Elliott LT, Sharp K, et al. The UK Biobank  
574 resource with deep phenotyping and genomic data. *Nature.* 2018;562(7726):203-+.

- 575 36. Mbatchou J, Barnard L, Backman J, Marcketta A, Kosmicki JA, Ziyatdinov A, et al.  
576 Computationally efficient whole-genome regression for quantitative and binary traits. *Nat*  
577 *Genet.* 2021;53(7):1097-+.
- 578 37. De Rosa MC, Glover HJ, Stratigopoulos G, LeDuc CA, Su Q, Shen YF, et al. *Gene*  
579 *expression atlas of energy balance brain regions.* *Jci Insight.* 2021;6(16).
- 580 38. Zhai R, Olias G, Chung WJ, Lester RAJ, Dieck ST, Langnaese K, et al. *Temporal*  
581 *appearance of the presynaptic cytomatrix protein bassoon during synaptogenesis.* *Mol Cell*  
582 *Neurosci.* 2000;15(5):417-28.
- 583 39. Schoch S, Gundelfinger ED. *Molecular organization of the presynaptic active zone.*  
584 *Cell Tissue Res.* 2006;326(2):379-91.
- 585 40. Altroock WD, Dieck ST, Sokolov M, Meyer AC, Sigler A, Brakebusch C, et al. *Functional*  
586 *inactivation of a fraction of excitatory synapses in mice deficient for the active zone protein*  
587 *bassoon.* *Neuron.* 2003;37(5):787-800.
- 588 41. Angenstein F, Niessen HG, Goldschmidt J, Lison H, Altroock WD, Gundelfinger ED, et  
589 al. *Manganese-enhanced MRI reveals structural and functional changes in the cortex of*  
590 *bassoon mutant mice.* *Cereb Cortex.* 2007;17(1):28-36.
- 591 42. Gundelfinger ED, Reissner C, Garner CC. *Role of Bassoon and Piccolo in Assembly and*  
592 *Molecular Organization of the Active Zone.* *Front Synaptic Neurosci.* 2015;7:19.
- 593 43. Hallermann S, Fejtova A, Schmidt H, Weyhersmuller A, Silver RA, Gundelfinger ED, et  
594 al. *Bassoon Speeds Vesicle Reloading at a Central Excitatory Synapse.* *Neuron.*  
595 2010;68(4):710-23.
- 596 44. Waites CL, Leal-Ortiz SA, Okerlund N, Dalke H, Fejtova A, Altroock WD, et al. *Bassoon*  
597 *and Piccolo maintain synapse integrity by regulating protein ubiquitination and degradation.*  
598 *Embo J.* 2013;32(7):954-69.
- 599 45. Hashida H, Goto J, Zhao ND, Takahashi N, Hirai M, Kanazawa I, et al. *Cloning and*  
600 *mapping of ZNF231, a novel brain-specific gene encoding neuronal double zinc finger*  
601 *protein whose expression is enhanced in a neurodegenerative disorder, multiple system*  
602 *atrophy (MSA).* *Genomics.* 1998;54(1):50-8.
- 603 46. Montenegro-Venegas C, Annamneedi A, Hoffmann-Conaway S, Gundelfinger ED,  
604 Garner CC. *BSN (bassoon) and PRKN/parkin in concert control presynaptic vesicle*  
605 *autophagy.* *Autophagy.* 2020;16(9):1732-3.
- 606 47. Yabe I, Yaguchi H, Kato Y, Miki Y, Takahashi H, Tanikawa S, et al. *Mutations in*  
607 *bassoon in individuals with familial and sporadic progressive supranuclear palsy-like*  
608 *syndrome.* *Sci Rep-Uk.* 2018;8.
- 609 48. Zheng H, Berthoud HR. *Neural systems controlling the drive to eat: mind versus*  
610 *metabolism.* *Physiology (Bethesda).* 2008;23:75-83.
- 611 49. Shah BP, Vong L, Olson DP, Koda S, Krashes MJ, Ye CP, et al. *MC4R-expressing*  
612 *glutamatergic neurons in the paraventricular hypothalamus regulate feeding and are*  
613 *synaptically connected to the parabrachial nucleus.* *P Natl Acad Sci USA.*  
614 2014;111(36):13193-8.
- 615 50. Fenselau H, Campbell JN, Versteegen AMJ, Madara JC, Xu J, Shah BP, et al. *A rapidly*  
616 *acting glutamatergic ARC -> PVH satiety circuit postsynaptically regulated by alpha-MSH.* *Nat*  
617 *Neurosci.* 2017;20(1):42-51.
- 618 51. Clafin KE, Sullivan AI, Naber MC, Flippo KH, Morgan DA, Neff TJ, et al.  
619 *Pharmacological FGF21 signals to glutamatergic neurons to enhance leptin action and lower*  
620 *body weight during obesity.* *Mol Metab.* 2022;64:101564.
- 621
